# Supplementary material for: Ergosterol Isolated from Antrodia camphorata Suppresses LPS-Induced Neuroinflammatory Responses in Microglia Cells and ICR Mice
Source: MDPI journal article supplement (doi:10.3390/molecules28052406), 2023-03-06
Supplement: s1 [file s1]

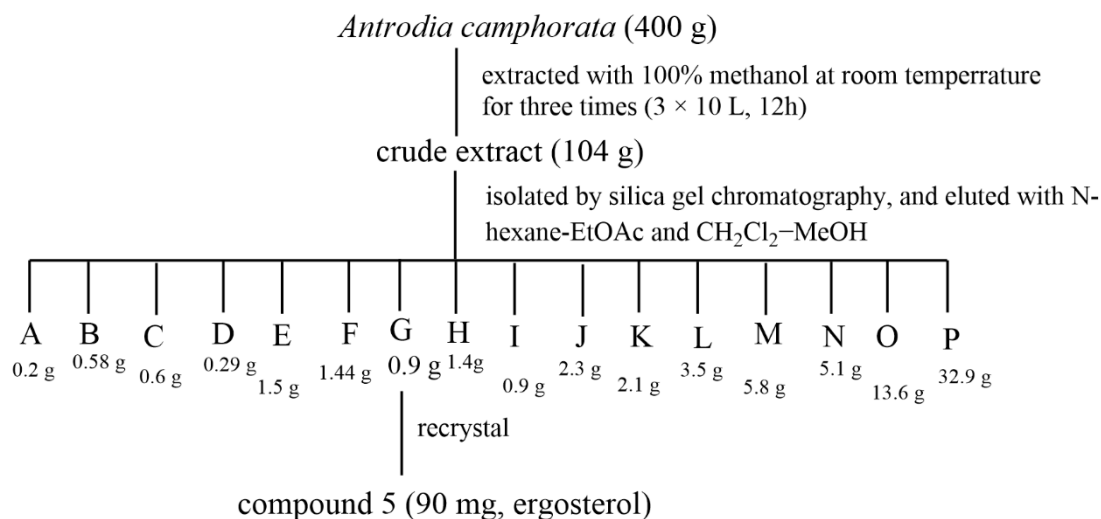

Figure S1. The separation process of compound **5** (Ergosterol).

**Table S1.** <sup>1</sup>H NMR and <sup>13</sup>C NMR Spectroscopic Data for Compound **5** (δ in ppm, *J* in Hz) in CDCl<sub>3</sub>

| position | δ <sub>H</sub>                         | δ <sub>C</sub> |
|----------|----------------------------------------|----------------|
| 1        | 2.4 (1H, m); 1.21 (1H, m)              | 38.4           |
| 2        | 1.98 (1H, m); 1.97 (1H, m)             | 32.0           |
| 3        | 3.57 (1H, tt, <i>J</i> = 11.1, 4.1 Hz) | 70.5           |
| 4        | 1.85 (1H, m); 1.83 (1H, m)             | 40.8           |
| 5        |                                        | 139.8          |
| 6        | 5.50 (1H, dd, <i>J</i> = 5.5, 2.2 Hz)  | 119.6          |
| 7        | 5.32, (1H, m)                          | 116.3          |
| 8        |                                        | 141.4          |
| 9        | 1.82 (1H, m)                           | 46.2           |
| 10       |                                        | 37.0           |
| 11       | 1.62 (1H, m); 1.21 (1H, m)             | 21.1           |
| 12       | 1.57 (1H, m); 1.81 (1H, m)             | 39.1           |
| 13       |                                        | 42.8           |
| 14       | 2.22, (1H, m)                          | 54.6           |
| 15       | 2.00 (1H, m); 1.41 (1H, m)             | 23.0           |
| 16       | 1.81 (1H, m); 1.30 (1H, m)             | 28.3           |
| 17       | 1.21, (1H, m)                          | 55.7           |

|    |                                   |       |
|----|-----------------------------------|-------|
| 18 | 0.56, (3H, s)                     | 12.1  |
| 19 | 0.88, (3H, s)                     | 16.3  |
| 20 | 1.23, (1H, m)                     | 40.4  |
| 21 | 0.97, (3H, d, $J = 6.8$ Hz)       | 21.1  |
| 22 | 5.10 (1H, dd, $J = 15.3, 7.3$ Hz) | 135.6 |
| 23 | 5.16 (1H, dd, $J = 15.3, 7.3$ Hz) | 132.0 |
| 24 | 1.41, (1H, m)                     | 42.8  |
| 25 | 1.43, (1H, m)                     | 33.1  |
| 26 | 0.76 (3H, d, $J = 6.8$ Hz)        | 20.0  |
| 27 | 0.77 (3H, d, $J = 6.8$ Hz)        | 19.7  |
| 28 | 0.85 (3H, d, $J = 6.8$ Hz)        | 17.6  |

$^1\text{H}$  NMR spectra measured at 600 MHz,  $^{13}\text{C}$  NMR spectra measured at 150 MHz.

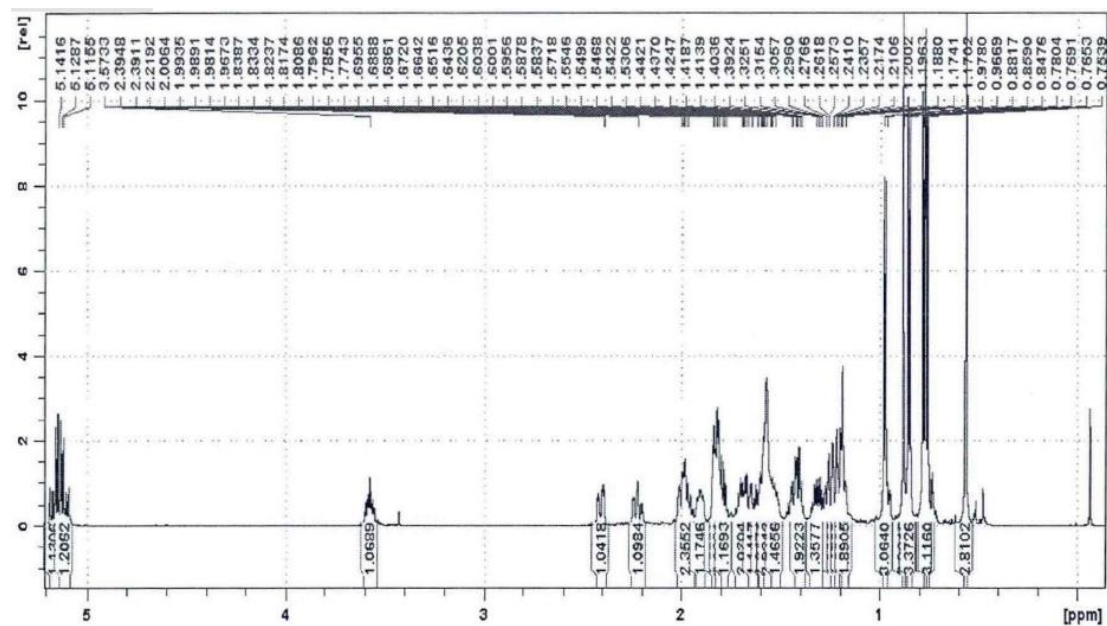

Figure S2. The  $^1\text{H}$ -NMR spectrum of compound **5** (Ergosterol).

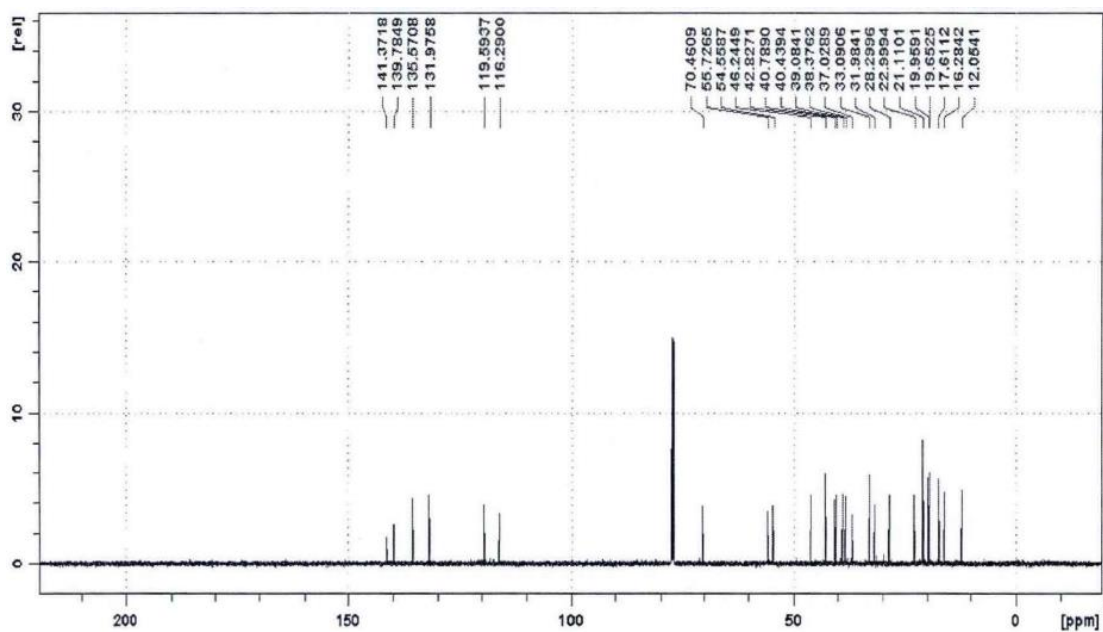

Figure S3. The  $^{13}\text{C}$ -NMR spectrum of compound **5** (Ergosterol).

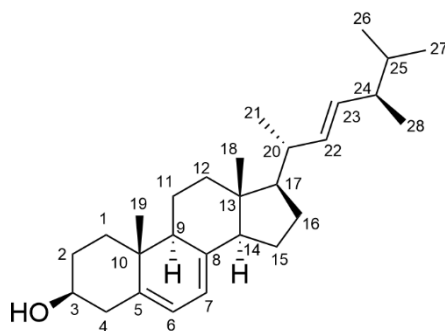

Figure S4. The structure of compound **5** (Ergosterol).

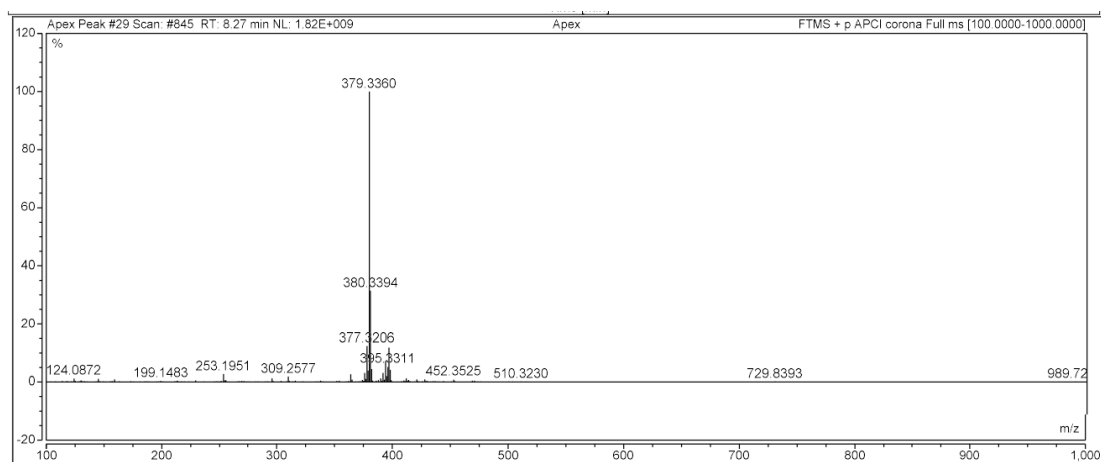

Figure S5. The HRESIMS spectrum of compound **5** (Ergosterol).

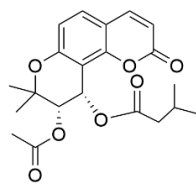

corymbocoumarin

Figure S6. The structure of compound **24** (corymbocoumarin).

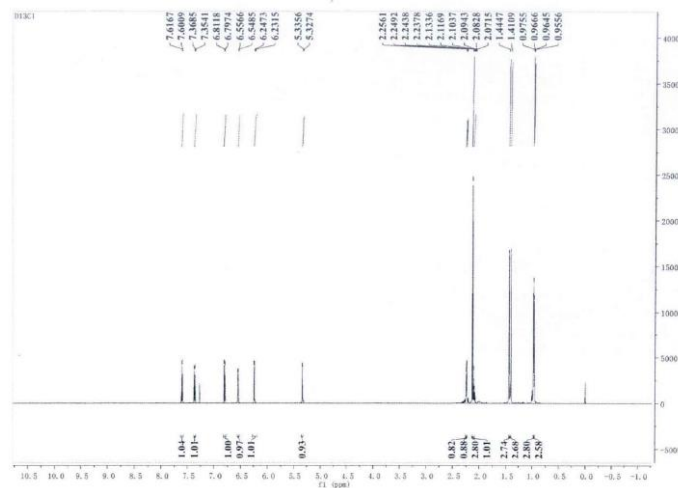

Figure S7. The  $^1\text{H}$ -NMR spectrum of compound **24**.

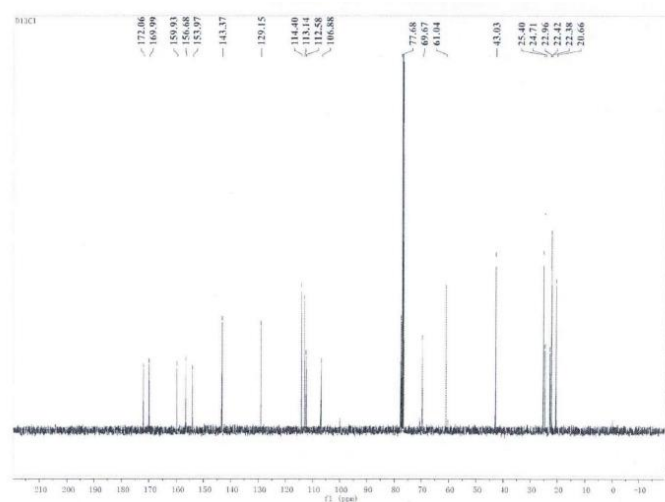

Figure S8. The  $^{13}\text{C}$ -NMR spectrum of compound **24**.

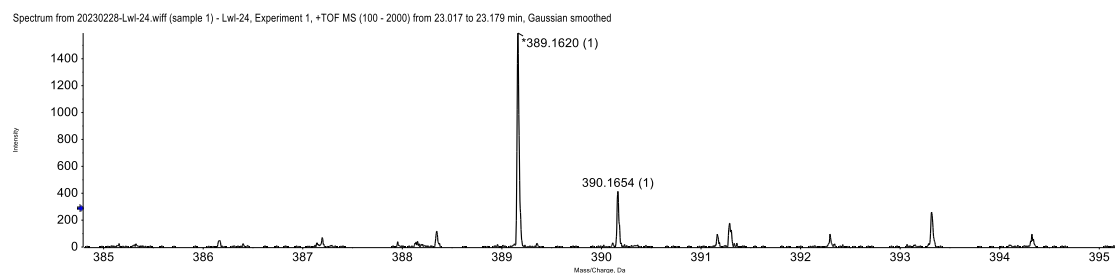

Figure S9. The HRESIMS spectrum of compound **24**.

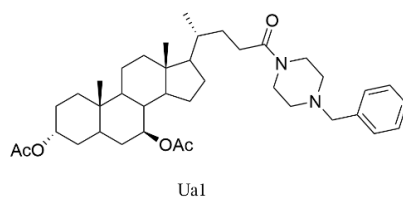

Figure S10. The structure of compound **48** (Ua1).

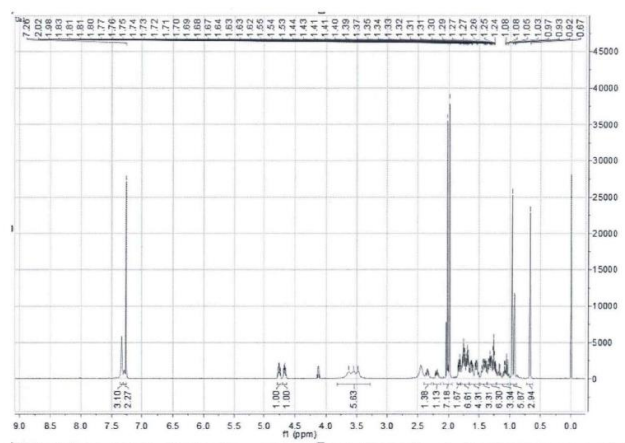

Figure S11. The  $^1\text{H}$ -NMR spectrum of compound **48**.

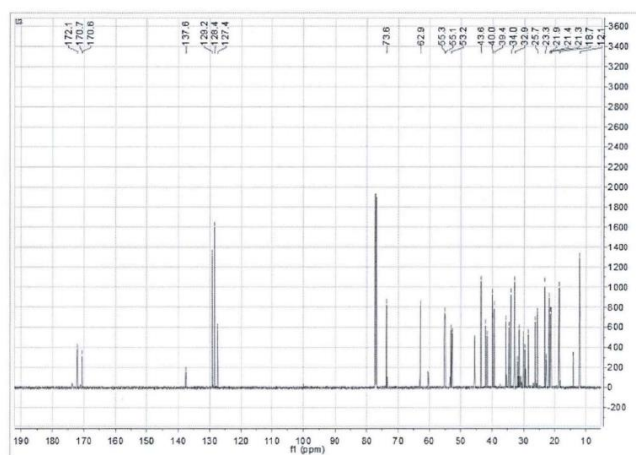

Figure S12. The  $^{13}\text{C}$ -NMR spectrum of compound **48**.

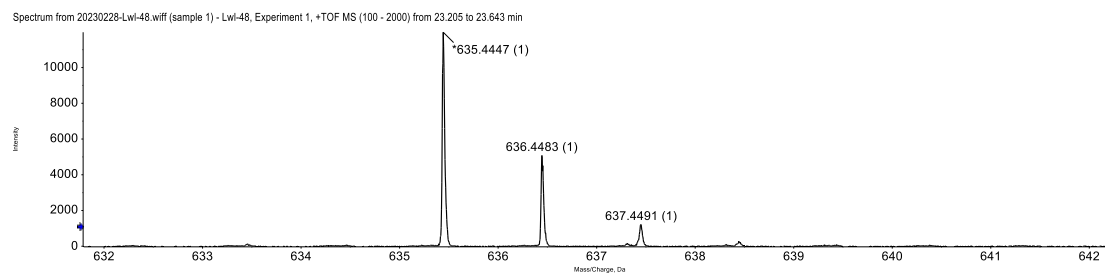

Figure S13. The HRSIMS spectrum of compound **48**.

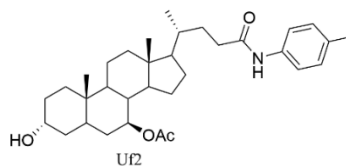

Figure S14. The structure of compound **49**.

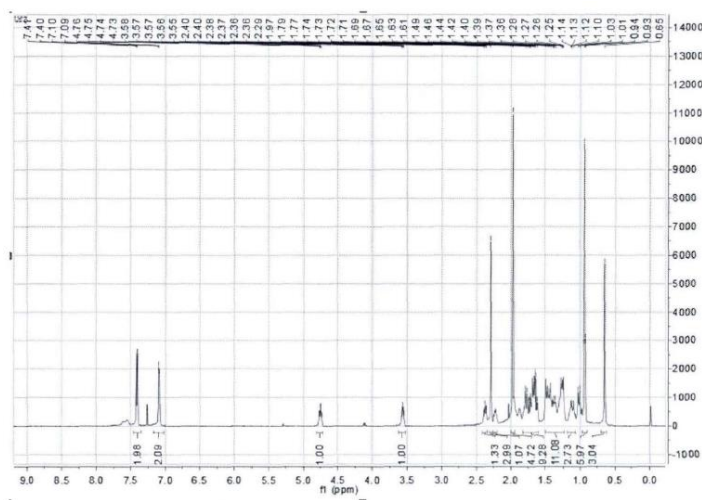

Figure S15. The  $^1\text{H}$ -NMR spectrum of compound **49**.

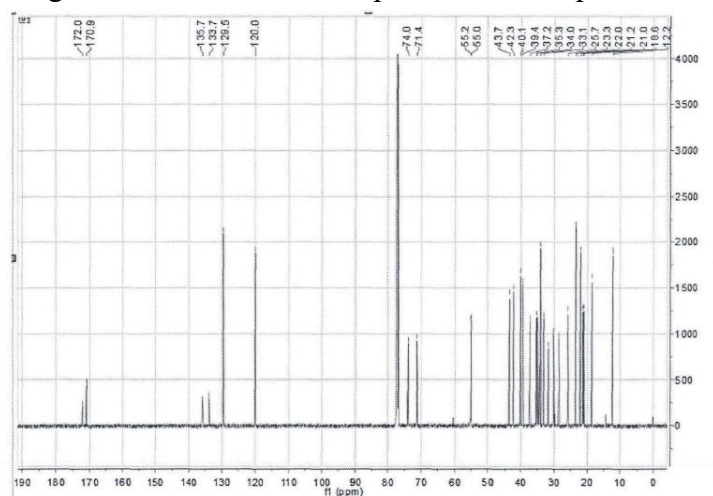

Figure S16. The  $^{13}\text{C}$ -NMR spectrum of compound **49**.

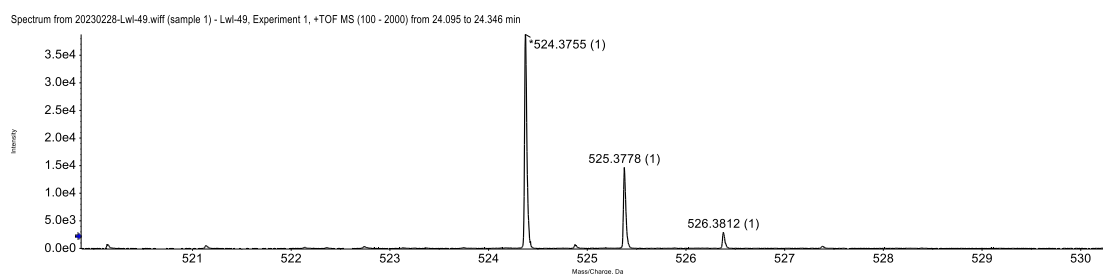

Figure S17. The HRESIMS spectrum of compound **49**.
